# Supplementary material for: Fluid flow-induced modulation of viability and osteodifferentiation of periodontal ligament stem cell spheroids-on-chip
Source: Royal Society of Chemistry journal article supplement (doi:10.1039/d3bm01011b), 2023-01-01
Supplement: d3bm01011b1.pdf [file d3bm01011b1.pdf]

## FLUID FLOW-INDUCED MODULATION OF VIABILITY AND OSTEODIFFERENTIATION OF PERIODONTAL LIGAMENT STEM CELL SPHEROIDS-ON-CHIP

Authors: Apurva MISHRA, Ren KAI, Srividya ATKURU, Yichen DAI, Filippo PICCININI, Philip M. PRESHAW, Gopu SRIRAM\*

### SUPPLEMENTARY FIGURES

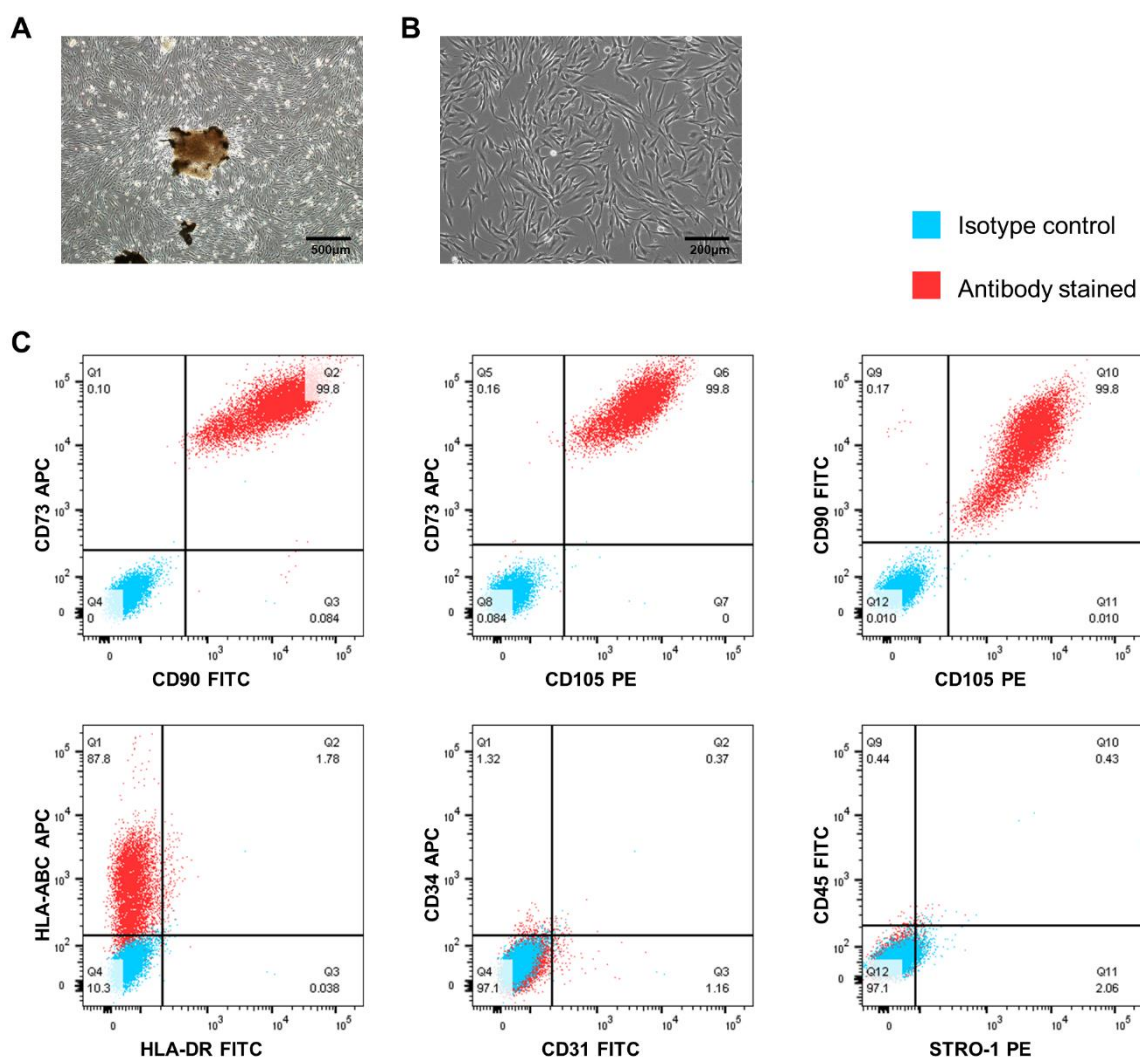

**Supplementary Figure 1. Characterization of PDLSCs cultured under animal component-free (ACF) culture conditions.** Phase contrast images of outgrowth of PDLSCs from periodontal tissue fragments (**A**), and after expansion (**B**) under ACF culture conditions. (**C**) Representative flow cytometry bivariate plots showing the expression of surface markers for mesenchymal (CD73, CD90, CD105), major histocompatibility complex (HLA-ABC and HLA-DR), and hematopoietic (CD31, CD34, CD45).

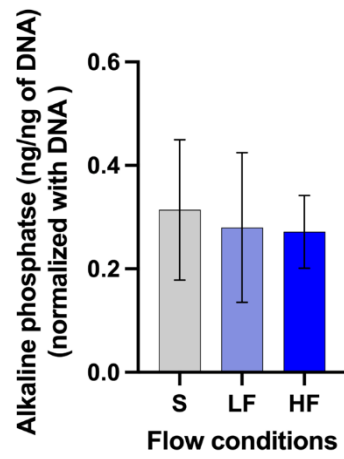

**Supplementary Figure 2.** Intracellular alkaline phosphatase levels of PDLSC spheroids under flow conditions using media without osteogenic factors. (Data presented as mean $\pm$  SD, n=5) (S: static, LF: low-flow, HF: high-flow)
